# Supplementary material for: Surge dynamics in the Nathorstbreen glacier system, Svalbard
Source: Copernicus journal article supplement (doi:10.5194/tc-8-623-2014), 2014-04-11
Supplement: Supplementary file 1 [file captions_Photo.docx]

**Overview**

01 2007. Front of Nathorstbreen Glacier System (NGS). Zawadzkibreen in foreground, then separated by medial moraines; Polakkbreen, Nathorstbreen and Dobrowolskibreen. Note that the surge of latter has activated the terminus and also spread into part of Nathorstbreen. Doktorbreen and Liestølbreen in the background. Photo: F. Mehlum 06.09.2007

02. March 2009. Front of Nathorstbreen Glacier System during initial surge advance, also some sea ice is being pushed. Zawadzkibreen in the foreground. Photo: M. Eckerstorfer 24.03.2009

03. June 2009. Nathorstbreen Glacier System surge advance. Sea ice is being pushed and is breaking apart. Photo: G. Bangjord

04. September 2009. Nathorstbreen Glacier System surge advance. Photo: O. Einang 08.09.2009

05. September 2009. Nathorstbreen Glacier System surge advance. Photo: E. Næss 25.09.2009

06. February 2010. Nathorstbreen Glacier System surge advance. Photo: M. Sund 21.02.2010

07. April 2010. Nathorstbreen Glacier System surge advance. Photo: M. Eiken 20.04.2010

08. July 2010. Nathorstbreen Glacier System surge advance. Ice mélange in front of the terminus is breaking apart. Photo: H. Juliussen 16.07.2010

09. July 2010. Nathorstbreen Glacier System surge advance. Photo: C. H. von Quillfeldt 19.09.2010

10. February 2011. Nathorstbreen Glacier System surge advance. Photo: C. H. von Quillfeldt 14.02.2011

11. August 2011. Nathorstbreen Glacier System surge advance. Photo: M. Sund 16.08.2011

12. June 2011. Nathorstbreen Glacier System surge advance, view towards west. Liestølbreen and Doktorbreen in the foreground. Photo: M. Sund 26.06.2011

13. August 2012. Nathorstbreen Glacier System surge advance. Photo: M. Sund/SAS 01.08.2012

14. August 2013. Nathorstbreen Glacier System surge advance. Photo: M. Sund 30.08.2013

21 June 2007. Zawadzkibreen seen towards NE. Lower part is covered by fog. Photo: M. Sund 19.06.2007

22 September 2010. Zawadzkibreen seen towards NE. Photo: C. H. von Quillfeldt 19.09.2010

23 September 2010. Zawadzkibreen seen towards NE. Photo: M. Sund 27.09.2010

24 August 2011. Zawadzkibreen and Polakkbreen seen towards ENE. Photo: M. Sund 16.08.2011

25 August 2011. Confluence of Zawadzkibreen and Polakkbreen/Nathorstbreen seen towards ENE. Photo: M. Sund/SAS 16.08.2011

31 June 2007. Polakkbreen seen towards NE. Lower part is covered by fog. Photo: M. Sund 19.06.2007

32 September 2010. Polakkbreen seen towards NE. Photo: C. H. von Quillfeldt 19.09.2010

33 September 2010. Polakkbreen seen towards NE. Photo: M. Sund 27.09.2010

34 August 2011. Polakkbreen seen towards ESE. Photo: M. Sund 16.08.2011

41 Confluence of Polakkbreen and Nathorstbreen seen towards E. Photo: G. Bangjord 03.06.2009

42 Confluence of Polakkbreen and Nathorstbreen seen towards E. Photo: O. Einang 08.09.2009

43 Confluence of Zawadzkibreen and Polakkbreen/Nathorstbreen seen towards E. Photo: E. Næss 08.09.2009

44 Ljosfonn seen towards SE. Photo: T. Eiken 07.09.2009

45 Confluence of Dobrowolskibreen and Nathorstbreen seen towards W. Polakkbreen and Zawadzkibreen in the background. Photo: M.Sund 26.06.2011

**Details**

0) 1994 terminus of Nathorstbreen Glacier System. Photo: M. Sund, August 1994.

A) 2007. Towards NW. Dobrowolskibreen in front, the mountain Keipen lower left. Nathorstbreen and Polakkbreen (note the slightly curved medial moraine) in background. Photo: T. S. Pedersen 22.08.2007

B) 2008. Towards E. Confluence Dobrowolskibreen(left) and Nathorstbreen (right). Mountain Keipen to the right. Photo: M. Sund 18.03.2008

C) 2008. Towards WSW. Zawadzkibreen (note bulge to the right) and confluence with Nathorstbreen (foreground). Photo: M. Sund 18.03.2008

D) 2011. Towards W. Nathorstbreen in foreground and Zawadzkibreen in background. Photo: M. Sund 26.06.2011

E) 2008. Towards S. Polakkbreen at confluence with Nathorstbreen. Note the elevated ice surface along mountains to the right. Photo: M. Sund 18.03.2008

F) 2009. Towards ESE. Part of the Nathorstbreen Glacier System front. Photo: M. Sund 05.04.2009

G) 2009. Towards ESE. Part of the Nathorstbreen Glacier System front. Photo: M. Sund 28.08.2009

H) 2009. Towards E. Zawadzkibreen. Confluence with Nathorstbreen in the background. Photo: G. Bangjord 09.10.2009

I) 2009. Towards SW. Ljosfonn. Moutain Besshø in the background. Photo: T. Aagesen 04.09.2009

J) 2009. Towards E. Ljosfonn. Photo: T. Aagesen 04.09.2009

K) 2012. Towards SE. Dobrowolskibreen. Photo: M. Sund 19.07.2012

L) 2012. Towards NW. Dobrowolskibreen in foreground and Nathorstbreen in background. Photo: M. Sund 19.07.2012

M) 2012. Towards SE. Nathorstbreen. Mountain Keipen to the left and mountain Besshø in the background to the right. Photo: M. Sund 19.07.2012

N) 2012. Towards WNW. Confluence of Nathorstbreen and Polakkbreen. Photo: M. Sund 19.07.2012

O) 2012. Towards NE. Besshøbreen in foreground. Part of Mountain Besshø in the middle. Knokisen and Ljosfonn in the background. Photo: M. Sund 19.07.2012
